# Supplementary material
Source: publisher figshare collection journal article supplement (https://microbiology.figshare.com/ndownloader/files/20065607)
Supplement: Supplementary file 1 [file 20065607]

## Sheet: Table S1
Sample	Collection Date	Source	Serotype (qPCR)	Serotype	Genotype	Run Accession
91-0104	21/9/2015	plasma	2	2	III(AsianAmerican)	SRR8842525
91-0105	22/9/2015	plasma	2	2	III(AsianAmerican)	SRR7252349
91-0115	30/9/2015	plasma	3	-	-	SRR7252368
91-0118	5/10/2015	plasma	3	3	III	SRR7252362
91-0132	19/10/2015	plasma	1	1	V	SRR8883926
91-0135	27/10/2015	plasma	2	2	III(AsianAmerican)	SRR9004764
92-1001	2/10/2015	plasma	1	-	-	SRR7252337
92-1094	16/10/2015	plasma	2	2	III(AsianAmerican)	SRR8842524
CC0007	31/8/2010	serum	2	2	III(AsianAmerican)	SRR7252354
CC0009	31/8/2010	serum	3	3	III	SRR8842527
CC0010	27/8/2010	serum	3	3	III	SRR7252358
CC0011	27/8/2010	serum	3	3	III	SRR8842526
CC0030a	1/9/2010	serum	4	4	II	SRR7252356
CC0030b	1/9/2010	serum	4	4	II	SRR7252355
CC0031	2/9/2010	serum	2	2	III(AsianAmerican)	SRR8842521
CC0061	20/1/2011	serum	4	4	II	SRR8842520
CC0066	11/10/2011	serum	4	4	II	SRR8842523
CC0067	18/10/2011	serum	4	4	II	SRR8842522
CC0116	29/3/2012	serum	4	4	II	SRR8842519
CC0150	9/5/2012	serum	2	2	III(AsianAmerican)	SRR8842518
CC0186	17/7/2012	serum	4	4	II	SRR9004763
UCUG0186	30/8/2010	serum	4	4	II	SRR8842528
Negative Control	-	-	-	-	-	SRR8842530
Positive Control	-	-	2	2	V(AsianI)	SRR8886136
Spiked sample	-	-	1,2,3,4	1,2,3,4	V,III(Asian American),III,II	SRR8842529
